# Supplementary material
Source: publisher site journal article supplement (https://www.dovepress.com/article/310116)
Supplement: Supplementary file 1 [file get_supplementary_file.php]

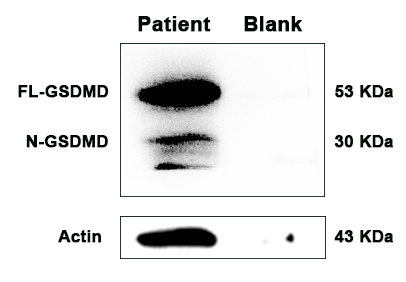


**Supplementary Figure 1.** Western blot bands from untreated Schirmer strips, shown as the blank control.


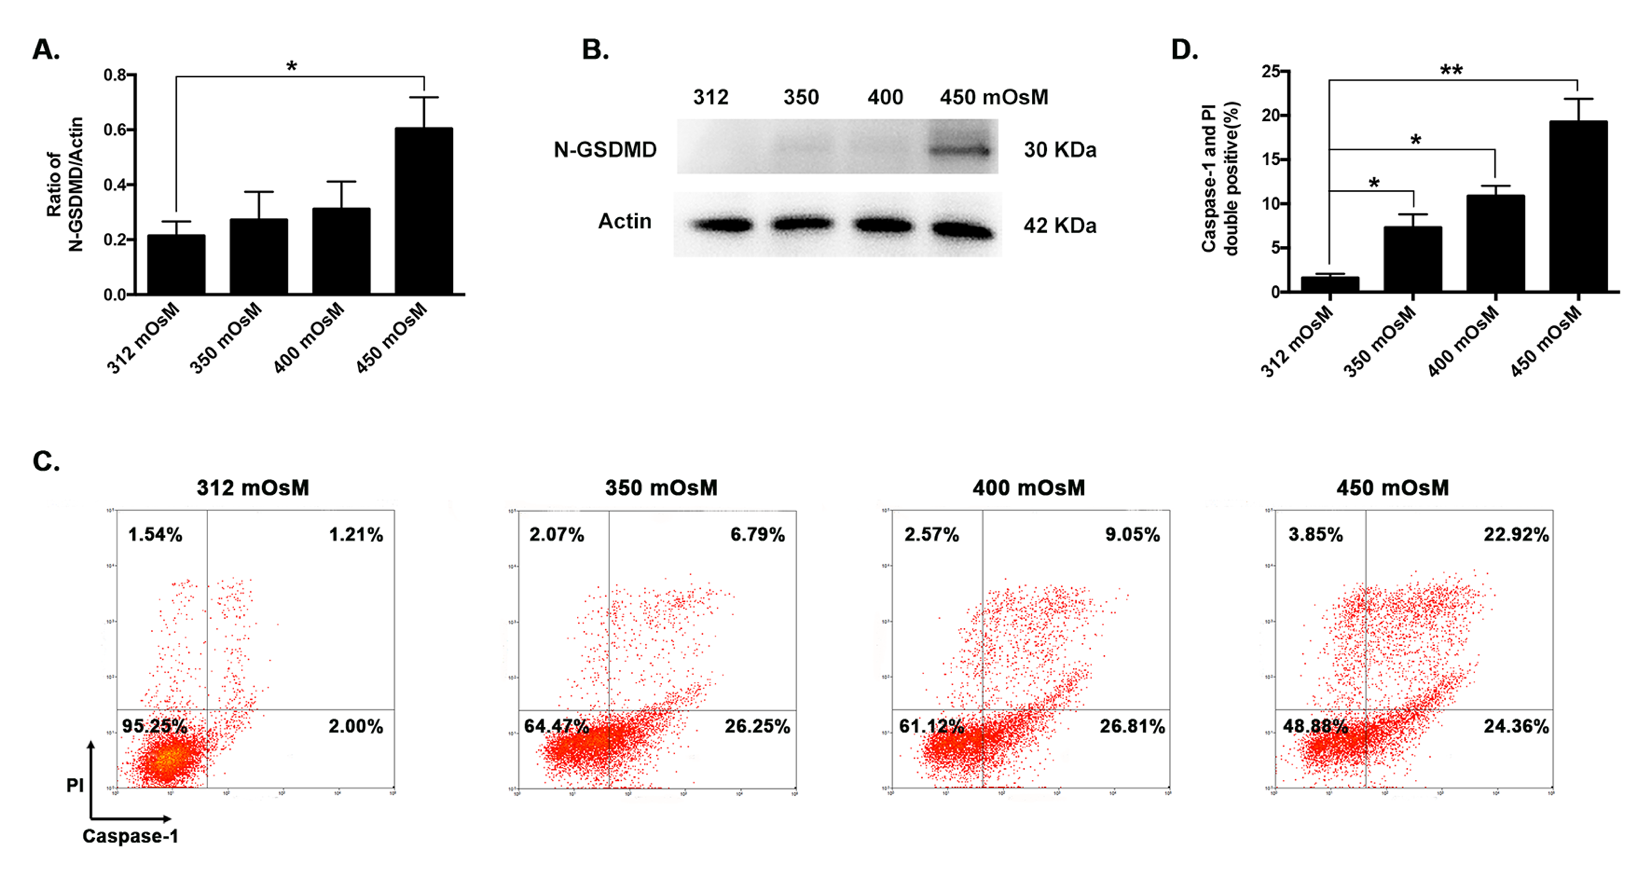


**Supplementary Figure 2.** Increased pyroptosis was observed in hyperosmotic stress (HS)-triggered human corneal epithelial cells (iHCECs) in vitro in a dose-dependent manner. **(A, B)** Relative protein level of N-GSDMD in iHCECs cultured under isosmotic medium (312 mOsM), and hyperosmotic medium (350, 400, or 450 mOsM). **(C, D)** The proportion of pyroptotic cells under isosmotic or hyperosmotic medium, shown as Caspase 1/PI double positive by flow cytometry. * *P* < 0.05, ** *P* < 0.01.
